# Supplementary material
Source: Springer Nature journal article supplement (https://www.springermedizin.de/resource/supplementary/12881_2011_869_MOESM5_ESM.pdf/9451258)

A

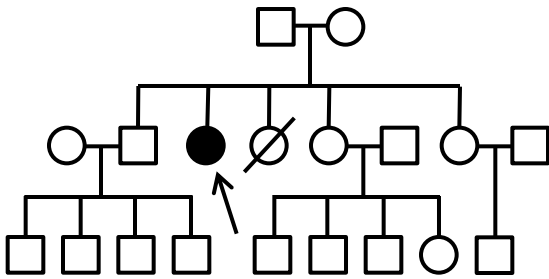

B

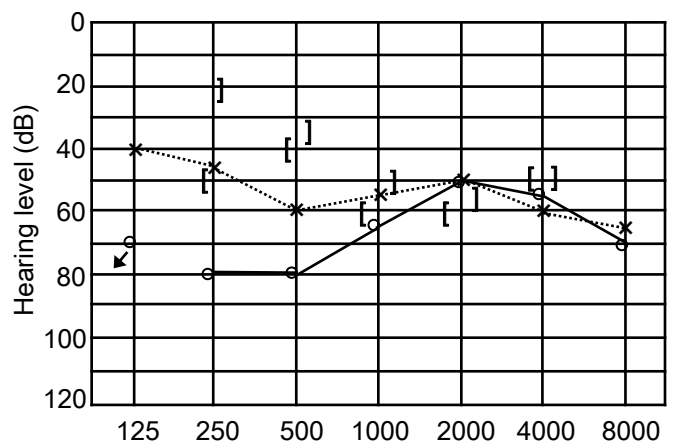

C

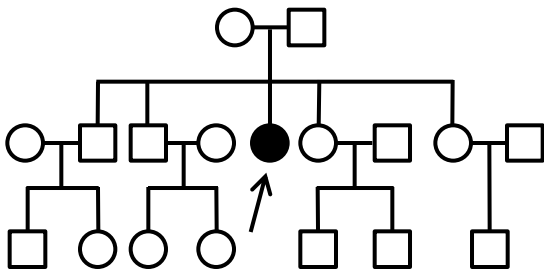

D

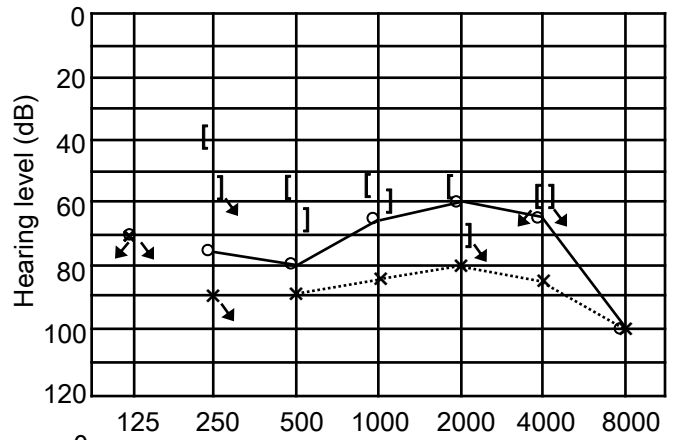

E

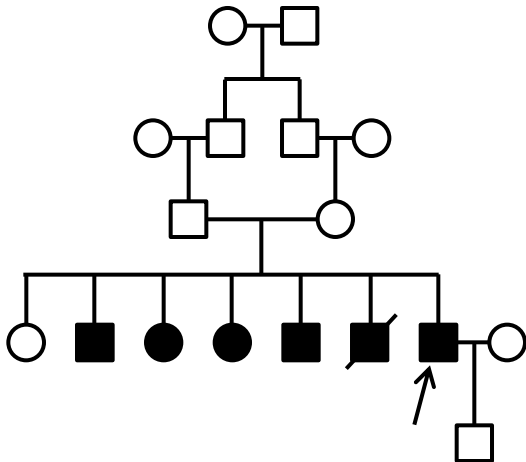

F

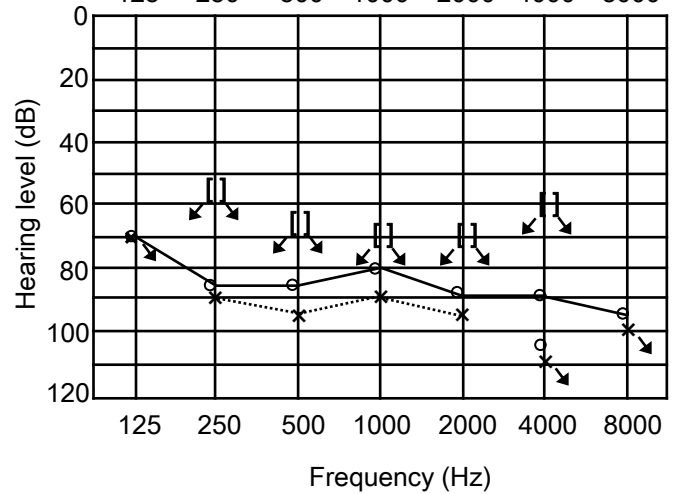

G

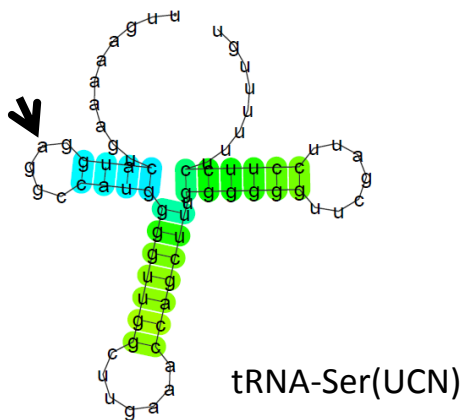

H

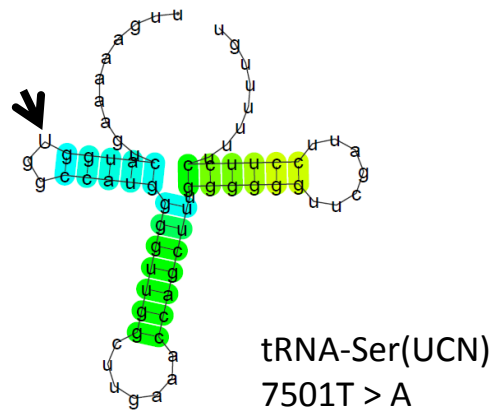

Supplement: MOESM5 [file 9451258]
